# Supplementary material
Source: PubMed Central journal article supplement (PMC404127)

### fMRI-constrained MEG activity at posterior N1 latency

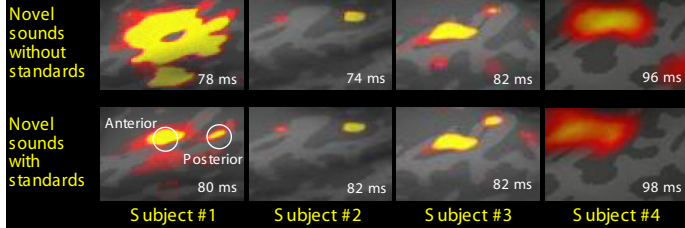

### fMRI-constrained MEG activity at anterior N1 latency

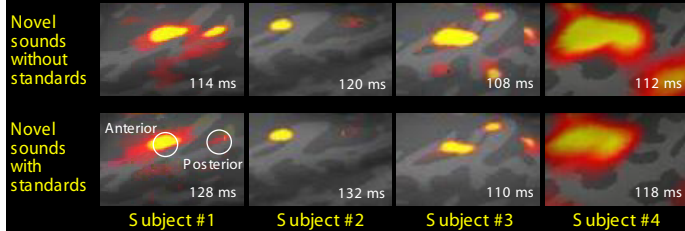

Supplement: pnas_101_17_6809__1.pdf [file pnas_101_17_6809__1.pdf]
